# Supplementary material for: Self-assembled Mn-doped MoS2 hollow nanotubes with significantly enhanced sodium storage for high-performance sodium-ion batteries
Source: Royal Society of Chemistry journal article supplement (doi:10.1039/c8qi00285a), 2018-01-01
Supplement: c8qi00285a1.pdf [file c8qi00285a1.pdf]

## Self-assembled Mn-doped MoS<sub>2</sub> hollow nanotubes with significantly enhanced sodium storage for high-performance sodium-ion batteries

Tian Zheng, Guangda Li\*, Jianhong Dong, Qiaoqiao Sun and Xiangeng Meng\*

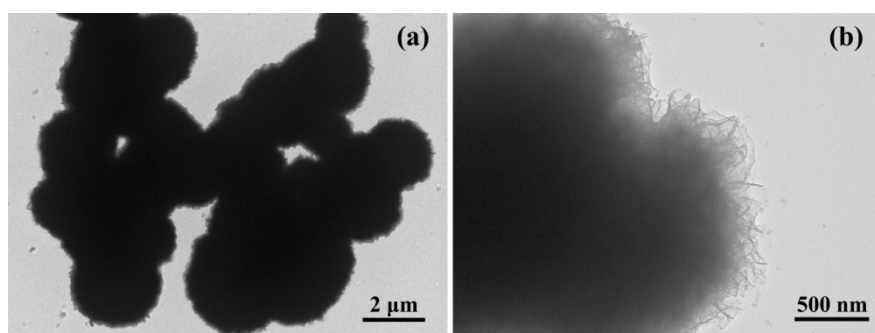

Figure S1. TEM images of the bulk MoS<sub>2</sub>.

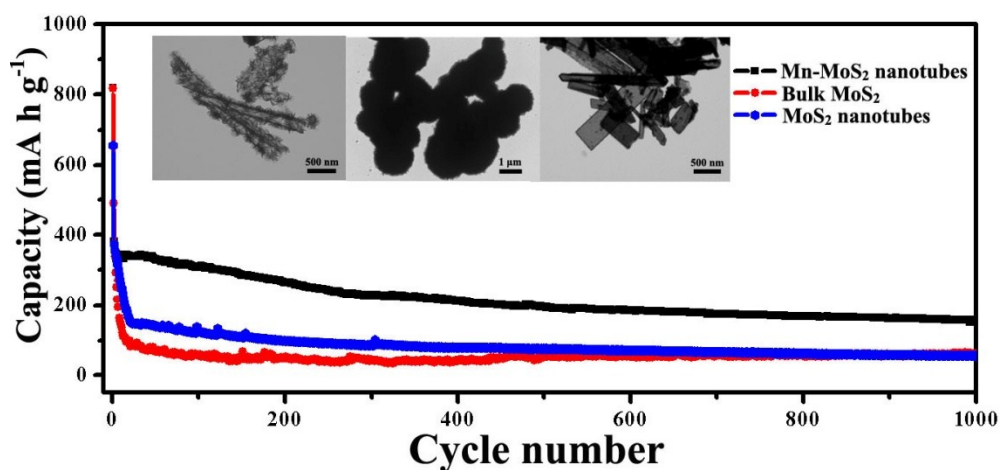

Figure S2. Cycling performance of the Mn-MoS<sub>2</sub> nanotubes, bulk MoS<sub>2</sub> and undoped MoS<sub>2</sub> nanotubes at the current density of 1 A g<sup>-1</sup> and the corresponding TEM images of these samples (shown in the inset).

Table S1 Electrochemical performance of recent progress on metal sulfide material for SIBs.

| Materials                                  | Current density<br>(mA g <sup>-1</sup> ) | Cycle number | Capacity<br>(mA h g <sup>-1</sup> ) | References |
|--------------------------------------------|------------------------------------------|--------------|-------------------------------------|------------|
| ZnS spheres                                | 640                                      | 100          | 423.0                               | 1          |
| WS <sub>2</sub> nanowires                  | 100                                      | 50           | 388.8                               | 2          |
| Flower-like Sb <sub>2</sub> S <sub>3</sub> | 200                                      | 100          | 641.7                               | 3          |
| Hollow sphere<br>MnS/rGo                   | 100                                      | 125          | 308.0                               | 4          |
| Ni <sub>3</sub> S <sub>2</sub> particals   | 450                                      | 40           | 250.0                               | 5          |
| 3D-flowers SnS <sub>2</sub>                | 800                                      | 50           | 180.0                               | 6          |
| FeS <sub>2</sub> spheres                   | 200                                      | 60           | 240.0                               | 7          |
| CoS/rGo particals                          | 100                                      | 100          | 230.8                               | 8          |
| MoS <sub>2</sub> nanofibers                | 100                                      | 30           | 474.0                               | 9          |
| MoS <sub>2</sub> nanoflowers               | 200                                      | 300          | 295.0                               | 10         |
| MoS <sub>2</sub> nanosheets                | 320                                      | 100          | 251.0                               | 11         |
| MoS <sub>2</sub> /C tubes                  | 250                                      | 200          | 480.0                               | 12         |
| MoS <sub>2</sub> /C spheres                | 100                                      | 100          | 470.0                               | 13         |
| Mn-MoS <sub>2</sub><br>nanotubes           | 1000<br>100                              | 1000<br>200  | 160.0<br>441.0                      | This work  |

1. D. W. Su, K. Kretschmer and G. X. Wang, *Adv. Energy Mater.*, 2016, **6**, 1501785.
2. Y. C. Liu, N. Zhang, H. Y. Kang, M. H. Shang, L. F. Jiao and J. Chen, *Chem. Eur. J.*, 2015, **21**, 11878.
3. Y. Y. Zhu, P. Nie, L. F. Shen, S. Y. Dong, Q. Sheng, H. S. Li, H. F. Luo and X. G. Zhang, *Nanoscale*, 2015, **7**, 3309.
4. X. J. Xu, S. M. Ji, M. Z. Gu and J. Liu, *ACS Appl. Mater. Interfaces*, 2015, **7**, 20957.
5. J. S. Kim, S. W. Lee, X. J. Liu, G. B. Cho, K. W. Kim, I. S. Ahn, J. H. Ahn, G. X. Wang and H. J. Ahn, *Curr. Appl. Phys.*, 2011, **11**, S11.
6. E. Cho, K. S. Song, M. H. Park, K. W. Nam and Y. M. Kang, *Small*, 2016, **12**, 2510.

7. Z. Hu, Z. Zhu, F. Cheng, K. Zhang, J. Wang, C. Chen and J. Chen, *Energy Environ. Sci.*, 2015, **8**, 1309.
8. Q. Zhou, L. Liu, G. X. Guo, Z. C. Yan, J. L. Tan, Z. F. Huang, X. Y. Chen and X. Y. Wang, *RSC Adv.*, 2015, **5**, 71644.
9. S. D. Lacey, J. Wan, A. v. W. Cresce, S. M. Russell, J. Dai, W. Bao, K. Xu and L. Hu, *Nano Lett.*, 2015, **15**, 1018.
10. Z. Hu, L. Wang, K. Zhang, J. Wang, F. Cheng, Z. Tao and J. Chen, *Angew. Chem. Int. Ed.*, 2014, **126**, 13008.
11. D. W. Su, S. X. Dou and G. X. Wang, *Adv. Energy Mater.*, 2015, **5**, 1401205.
12. X. Q. Zhang, X. N. Li, J. W. Liang, Y. C. Zhu and Y. T. Qian, *Small*, 2016, **12**, 2484.
13. Y. Y. Lu, Q. Zhao, N. Zhang, K. X. Lei, F. J. Li and J. Chen, *Adv. Funct. Mater.*, 2016, **26**, 911.
